# Supplementary material for: Transcriptomic analysis of the stationary phase response regulator SpdR in Caulobacter crescentus
Source: PubMed Central journal article supplement (PMC4830024; doi:10.1186/s12866-016-0682-y), 2016-04-12
Supplement: 12866_2016_682_MOESM1_ESM.pdf [file 12866_2016_682_MOESM1_ESM.pdf]

Supplemental Material

Carolina A. P. T. da Silva, Rogério F. Lourenço, Ricardo R. Mazzon, Rodolfo A. Ribeiro, and Marilis V. Marques. Transcriptomic analysis of the stationary phase response regulator SpdR in *Caulobacter crescentus*

**Table S1.** Bacterial strains, plasmids, and oligonucleotides used in this work

| Strain, plasmid or oligonucleotide | Description                                                                            | Reference or source <sup>a</sup> |
|------------------------------------|----------------------------------------------------------------------------------------|----------------------------------|
| <i>Caulobacter crescentus</i>      |                                                                                        |                                  |
| NA1000                             | synchronizable derivative of CB15                                                      | Evinger and Agabian, 1977        |
| MM80                               | NA1000 $\Delta$ CC0517                                                                 | This Work                        |
| MM85                               | NA1000 $\Delta$ spdR                                                                   | This Work                        |
| $\Delta$ cspD                      | NA1000 $\Delta$ cspD                                                                   | Lang and Marques, 2004           |
| SP0200                             | NA1000 $\Delta$ spoT                                                                   | Da Silva et al., 2010            |
| <i>Escherichia coli</i>            |                                                                                        |                                  |
| DH5 $\alpha$                       | ( $\Phi$ 80lacZ $\Delta$ M15) <i>hsdR17 recA1 endA1 gyrA96 thi-1 relA1</i>             | Hanahan, 1983                    |
| BL-21                              | <i>E. coli</i> B F <sup>-</sup> <i>dcm ompT hsdS(rB<sup>-</sup>mB<sup>-</sup>) gal</i> | Stratagene                       |
| S17-1                              | 294::RP4-2(Tc::Mu)(Km::Tn7)                                                            | Simon et al., 1983               |
| <b>Plasmids</b>                    |                                                                                        |                                  |

---

|                      |                                                                                  |                            |
|----------------------|----------------------------------------------------------------------------------|----------------------------|
| pGEM                 | cloning vector, Ap <sup>r</sup>                                                  | Promega                    |
| pET28a               | expression vector, Kan <sup>r</sup>                                              | Novagen                    |
| pRK/ <i>lacZ</i> 290 | Reporter vector for transcriptional fusions to<br><i>lacZ</i> , Tet <sup>r</sup> | Gober and Shapiro,<br>1992 |
| pNPTS138             | Suicide vector, containing <i>oriT sacB</i> , Kan <sup>r</sup>                   | D. Alley, unpublished      |
| pCA50                | expression vector pET28a containing the<br><i>spdR</i> gene                      | This Work                  |
| pCA60                | pRK/ <i>lacZ</i> 290 with the <i>spdS</i> regulatory region                      | This Work                  |

### Oligonucleotides

|                    |                                |
|--------------------|--------------------------------|
| AUTO-1             | CGAATTCCTTCGGCACATAGGGGGCCG    |
| HIST-1             | CGGATCCGGCCGCAGAATTGTCCAGAAT   |
| HIP-1              | GCCGGCTCAAGCTTTCGCCG           |
| HIP-2              | GGGATCCCGATGCGGCGCGAGCGTTGG    |
| HIP-3              | GGGATCCCAGAGCCTGACCCGCTTCCTC   |
| HIP-4              | CGAATTCGCGCAGAACTACGCCGTGC     |
| RR1                | CGGGCCCCCAACTCCAATCTGCTGTGG    |
| RR2                | TGGATCCTCCGCCATAAAAGTCAGCGC    |
| RR3                | CGGATCCAGAAGCGTTTAAGTTGCTCCCTC |
| RR4                | AGAATTCGTTTGAATTATAATCGGGAGGA  |
| RT CC_0247 Forward | ATGCTGTTCTGGACATGCGGCT         |

---

---

|                    |                        |
|--------------------|------------------------|
| RT CC_0247 Reverse | TGTTGCCATAGCCCGTCAGCAT |
| RT CC_0445 Forward | TGGCGGACGAATTCAACATC   |
| RT CC_0445 Reverse | AACGAGGACAGCTTGGAGAA   |
| RT CC_0446 Forward | AGCCCTACAAGTCGAGCAAC   |
| RT CC_0446 Reverse | CGCTGCAGGATGTAGTTGGA   |
| RT CC_0517 Forward | TGTCTGAAGAGTACGCCAACG  |
| RT CC_0517 Reverse | AAGCGCGTAGAGAAGGTCTG   |
| RT CC_0583 Forward | TCAATTCGCAACTGGTGTCC   |
| RT CC_0583 Reverse | CGCCAGGATCGTCTGAATCT   |
| RT CC_0679 Forward | GCTCCGCTTTGATCTCTGCCTT |
| RT CC_0679 Reverse | TCGATCCGATGAACCCCAACCT |
| RT CC_0731 Forward | CCGCCAGAAGCGCGGCCGGG   |
| RT CC_0731 Reverse | GTCGCTAGGCGAGCGCTCAT   |
| RT CC_1387 Forward | AGGACGTGCTTCTGCATGTGAC |
| RT CC_1387 Reverse | AGATTGACGACCTCGCTGACCT |
| RT CC_1745 Forward | CGACAATTTCTGCGTCCTGC   |
| RT CC_1745 Reverse | GCTCATAGAGCTGAACGGGT   |
| RT CC_1991 Forward | CTGACACTGTCTCGCTGGAA   |
| RT CC_1991 Reverse | CGGAAAGCTATCCAGCGTCT   |

---

---

|                       |                             |
|-----------------------|-----------------------------|
| RT CC_3654 Forward    | TGAAAGGTCTGAAGGGCGTG        |
| RT CC_3654 Reverse    | AGCGGGAACATGTCTGGGATA       |
| RTCC_3098 Forward     | AGGAAAAGTCGCTGCCGATGTC      |
| RTCC_3098 Reverse     | AGTTCTTCCAGGGTGGTCGGAT      |
| SHIFT CC_0517 Forward | GCGCCTTGTCCTCAGATCAG        |
| SHIFT CC_0517 Reverse | ACAAGCGCGTAGAGAAGGTC        |
| SHIFT CC_1746 Forward | TGACCTTGTTTGTGTGGGGG        |
| SHIFT CC_1746 Reverse | ATGGATCACGAGCGCCTTC         |
| M13 Forward (-20)     | GTAAAACGACGGCCAG            |
| M13 Reverse           | CAGGAAACAGCTATGAC           |
| REG-1                 | CGAATTCATGGCGGATATCGGAGAACT |
| REG-2                 | CTTCGAAGCGAGGGAGCAACTTAAACG |

---

<sup>a</sup> References:

- Lang EA, Marques MV. Identification and transcriptional control of *Caulobacter crescentus* genes encoding proteins containing a cold shock domain. *J Bacteriol.* 2004;186(17):5603–13
- da Silva CA, Balhasteros H, Mazzon RR, Marques MV. SpdR, a response regulator required for stationary-phase induction of *Caulobacter crescentus* cspD. *J Bacteriol.* 2010;192(22):5991–6000.
- Evinger M, Agabian N. Envelope-associated nucleoid from *Caulobacter crescentus* stalked and swarmer cells. *J Bacteriol.* 1977;132(1):294–301.
- Hanahan D. Studies on transformation of *Escherichia coli* with plasmids. *J Mol Biol.* 1983;166(4):557–80.
- Simon R, Priefer U, Puhler A. A broad host range mobilization system for in vivo genetic engineering: transposon mutagenesis in gram negative bacteria. *Nat Biotechnol.* 1983;1:784–91.
- Gober JW, Shapiro L. A developmentally regulated *Caulobacter* flagellar promoter is activated by 3' enhancer and IHF binding elements. *Mol Biol Cell.* 1992;3(8):913–26.
